# Supplementary material
Source: MDPI journal article supplement (https://www.mdpi.com/2073-4344/12/2/148)
Supplement: s1 [file s1]

# Natural Clay Modified with ZnO/TiO<sub>2</sub> to Enhance Pollutant Removal from Water

Julien G. Mahy <sup>1,\*</sup>, Marlène Huguette Tsaffo Mbognou<sup>1,2,3</sup>, Clara Léonard<sup>1</sup>, Nathalie Fagel<sup>4</sup>, Emmanuel Djoufac Woumfo<sup>2</sup>, and Stéphanie D. Lambert<sup>1</sup>

<sup>1</sup> Department of Chemical Engineering – Nanomaterials, Catalysis & Electrochemistry, University of Liège, B6a, Quartier Agora, Allée du six Août 11, 4000 Liège, Belgium. leonardclara1@gmail.com (C. L.); stephanie.lambert@uliege.be (S. D. L.);

<sup>2</sup> Laboratoire de Physico-chimie des matériaux minéraux, University of Yaounde I, 337 Yaounde, Cameroon. tsaffombognou@yahoo.fr (M. H. T. M.); edjoufac2000@yahoo.fr (E.D.W.);

<sup>3</sup> Institute of Geological and Mining Research (IRGM), 4410 Yaounde, Cameroon

<sup>4</sup> Laboratoire Argiles, Géochimie et Environnements sédimentaires (AGES), Department of Geology, Faculty of Sciences, University of Liège, Liège, B-4000, Belgium; nathalie.fagel@uliege.be (N.F.);

\* Correspondence: julien.mahy@uliege.be; Tel.: +32 366 35 63

## 1. Nitrogen adsorption-desorption isotherms

The adsorption-desorption isotherms are represented in Figure S1 for pure TiO<sub>2</sub> and pure ZnO samples and in Figure S2 for Clay/Cu<sup>2+</sup>, Clay/TiO<sub>2</sub>/Cu<sup>2+</sup>, Clay/ZnO/Cu<sup>2+</sup> and Clay/ZnO samples. As explained in section 2.2, two types of isotherms are clearly observed: (i) type I isotherm (microporous solid) for pure TiO<sub>2</sub> and Clay/TiO<sub>2</sub>/Cu<sup>2+</sup> samples; and (ii) type IV isotherm (mesoporous sample) for pure ZnO, Clay/Cu<sup>2+</sup>, Clay/ZnO/Cu<sup>2+</sup> and Clay/ZnO samples.

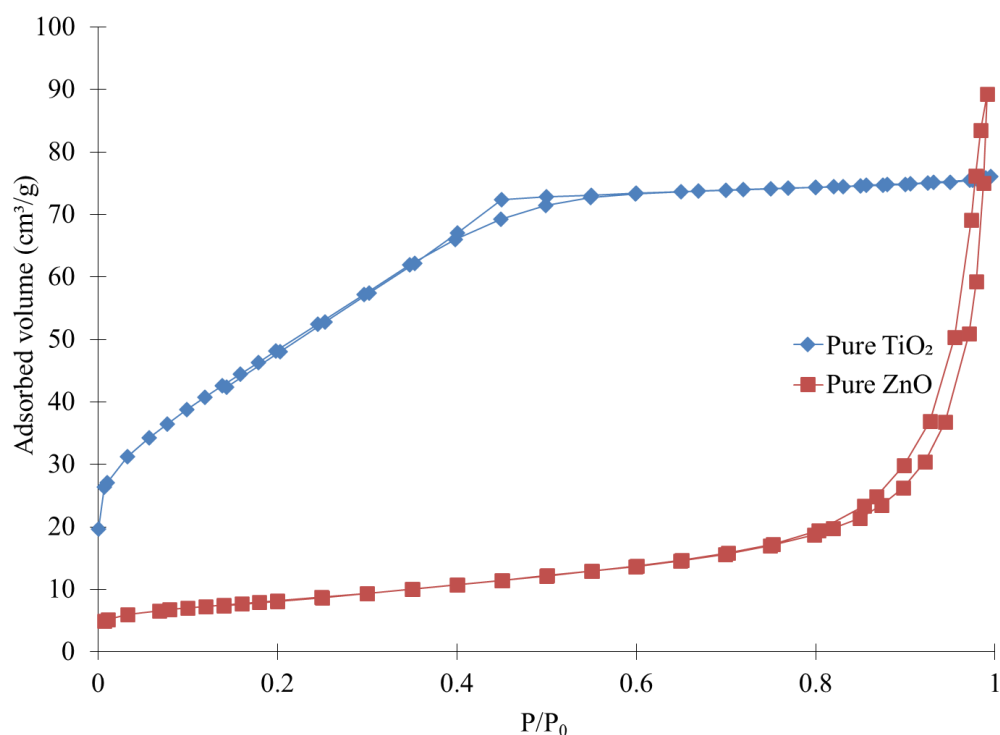

**Figure S1.** Nitrogen adsorption-desorption isotherms for (◆) pure TiO<sub>2</sub> and (■) pure ZnO samples.

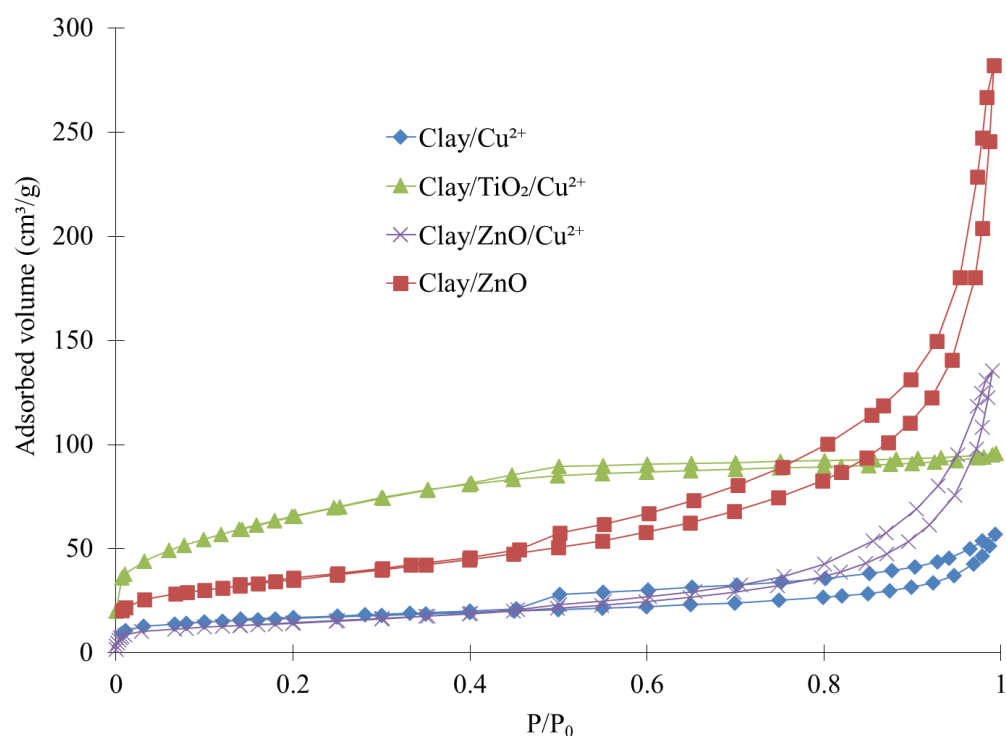

**Figure S2.** Nitrogen adsorption-desorption isotherms for (◆) Clay/Cu<sup>2+</sup>, (▲) Clay/TiO<sub>2</sub>/Cu<sup>2+</sup>, (×) Clay/ZnO/Cu<sup>2+</sup> and (■) Clay/ZnO samples.

## 2. SEM pictures

The samples with Cu<sup>2+</sup> (Clay/Cu<sup>2+</sup>, Clay/TiO<sub>2</sub>/Cu<sup>2+</sup> and Clay/ZnO/Cu<sup>2+</sup>) keep similar aspect as without it (Figure 4) and are represented in Figure S3.

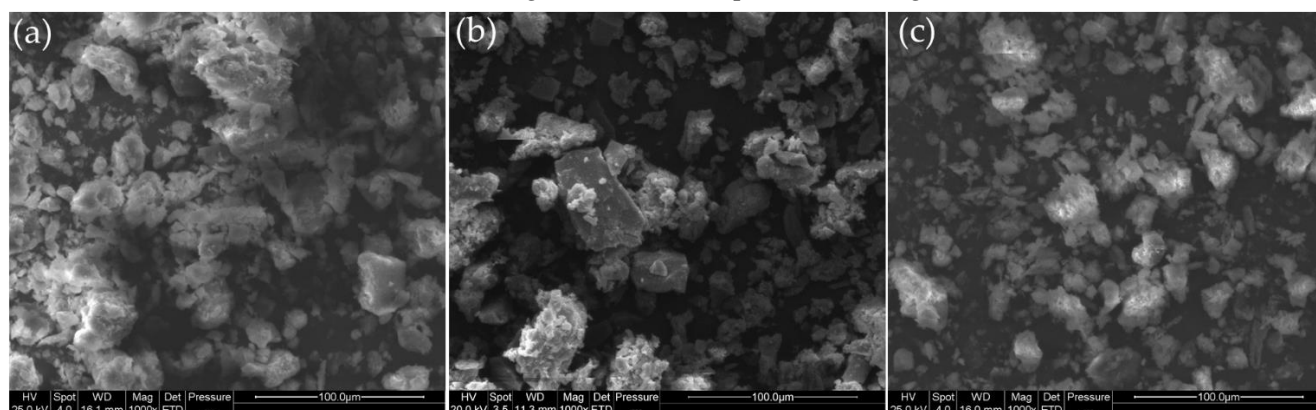

**Figure S3.** SEM pictures of (a) Clay/Cu<sup>2+</sup>, (b) Clay/TiO<sub>2</sub>/Cu<sup>2+</sup> and (c) Clay/ZnO/Cu<sup>2+</sup> samples at a 1000x magnification.

## 3. UV/visible spectra of the model pollutants

Figure S4 represents the FL UV/visible spectrum recorded for the initial FL solution ( $6 \times 10^{-5}$  M). After adsorption 6 h with bare Clay sample, the spectrum intensity decreases as shown on the Figure S4. The maximum peak is at 485 nm [1].

Figure S5 represents the PNP UV/visible spectrum recorded for the initial PNP solution ( $10^{-4}$  M) and the spectrum after 8 h in photocatalytic experiment with Clay/TiO<sub>2</sub> sample. The decrease of the maximum peak is well observed after photocatalysis. The maximum peak is located at 317 nm [2–4].

During the adsorption test, the spectrum stays identical as the initial PNP spectrum (●) in Figure S5 as no adsorption occurs.

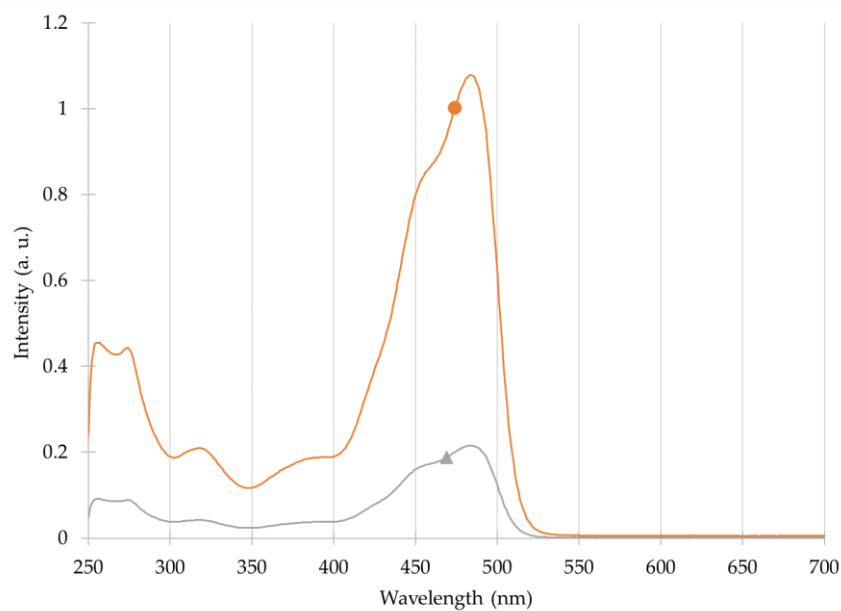

**Figure S4.** FL UV/visible spectrum for (●) initial FL solution and (▲) after 6 h in adsorption experiment with bare Clay sample.

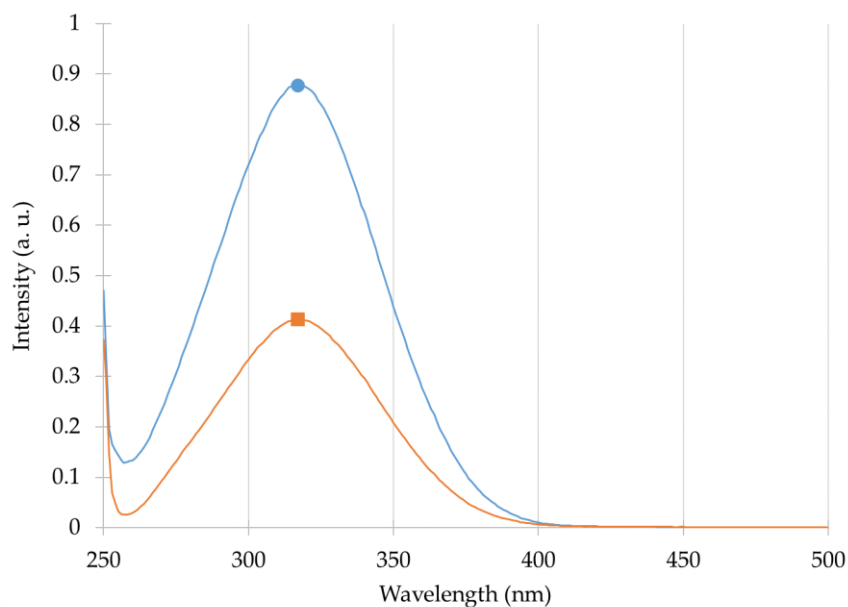

**Figure S5.** PNP UV/visible spectrum for (●) initial PNP solution and (■) after 8 h in photocatalytic experiment with Clay/TiO<sub>2</sub> sample.

## References

1. Panchompoo, J.; Aldous, L.; Baker, M.; Wallace, M.I.; Compton, R.G. One-Step Synthesis of Fluorescein Modified Nano-Carbon for Pd(II) Detection via Fluorescence Quenching. *Analyst* **2012**, *137*, 2054–2062, doi:10.1039/c2an16261j.
2. Xia, H.; Zhang, W.; Yang, Z.; Dai, Z.; Yang, Y. Spectrophotometric Determination of p -Nitrophenol under ENP Interference. *Journal of Analytical Methods in Chemistry* **2021**, *2021*, doi:10.1155/2021/6682722.
3. Paola, A. di; Augugliaro, V.; Palmisano, L.; Pantaleo, G.; Savinov, E. Heterogeneous Photocatalytic Degradation of Nitrophenols. **2003**, *155*, 207–214.
4. Augugliaro, V.; Palmisano\*, L.; Schiavello, M.; Sclafani, A.; Marchese, L.; Martra, G.; Miano, F. Photocatalytic Degradation of Nitrophenols in Aqueous Titanium Dioxide Dispersion. *Applied Catalysis* **1991**, *69*, 323–340, doi:http://dx.doi.org/10.1016/S0166-9834(00)83310-2.
